# Supplementary material for: Kaposi’s sarcoma-associated herpesvirus ORF34 is essential for late gene expression and virus production
Source: PubMed Central journal article supplement (PMC5428543; doi:10.1038/s41598-017-00401-7), 2017-03-23
Supplement: 41598_2017_401_MOESM1_ESM.pdf [file 41598_2017_401_MOESM1_ESM.pdf]

## **Supplementary information**

### **Kaposi's sarcoma-associated herpesvirus ORF34 is essential for late gene expression and virus production**

Mayu Nishimura, Tadashi Watanabe, Shota Yagi, Takahiro Yamanaka  
and Masahiro Fujimuro\*

Department of Cell Biology, Kyoto Pharmaceutical University,  
Misasagi-Shichono-cho 1, Yamashina-ku, Kyoto 607-8412, Japan.

\*: Address correspondence to Masahiro Fujimuro, PhD. Department of  
Cell Biology, Kyoto Pharmaceutical University, Misasagi-Shichono-cho 1,  
Yamashina-ku, Kyoto 607-8412, Japan; Tel: +81-75-595-4717  
E-mail: fuji2@mb.kyoto-phu.ac.jp

**Supplementary Table S1: Primers for construction of BACmid/ expression plasmid and real-time PCR/ RT-qPCR**

| Primer name                         | Primer sequences (5' -> 3')                                                                 |
|-------------------------------------|---------------------------------------------------------------------------------------------|
| <b>[BAC mutagenesis]</b>            |                                                                                             |
|                                     | <i>*a</i>                                                                                   |
| BACmut-ORF34-3stop-F                | aactcccctgaacagctctctcttggttccaactgatgTAGTTAGATAGTcccaggtccccaactctgTAGGGATAACAGGGTAATCGATT |
| BACmut-ORF34-3stop-R                | gcaagccgccgccactcgagattggctggacctcgggACTATCTAACTAcatcactgtgaaaccaagaGCCAGTGTACAACCAATTAACC  |
| BACmut-ORF34-Rev-F                  | aactcccctgaacagctctctcttggttccaactgatgcccaggtccccaactctgTAGGGATAACAGGGTAATCGATT             |
| BACmut-ORF34-Rev-R                  | gcaagccgccgccactcgagattggctggacctcgggcatcactgtgaaaccaagaGCCAGTGTACAACCAATTAACC              |
| <b>[Cloning expression plasmid]</b> |                                                                                             |
|                                     | <i>*b</i>                                                                                   |
| cloning_ORF34-F                     | acatgaattcATGTTTGCTTTGAGCTCGC                                                               |
| cloning_ORF34-R                     | ctaagtcgacTTAGAGTTGGTTGAGTCCATTCTCC                                                         |
| cloning_ORF34D1-R                   | ttaagtcgacTTAAGTTGGACACCTTTGGGTG                                                            |
| cloning_ORF34D2-R                   | ttaagtcgacTTAAGTGTCCGGAAGCATCTATG                                                           |
| cloning_ORF34D3-R                   | ttaagtcgacTTAAAGATCCCCTTTGGGAGC                                                             |
| cloning_ORF34D4-R                   | ttaagtcgacTTAAAGACCCTTCCAAGTTCCG                                                            |
| cloning_ORF34D5-R                   | taagtcgacTTAGTCCAGTGCATTTCCTCAC                                                             |
| cloning_ORF18-F                     | catgaattcATGCTCGGAAAATACGTGTGTG                                                             |
| cloning_ORF18-R                     | taaaccgctTAAACCCGCTTGTGTAAAC                                                                |
| cloning_ORF23-F                     | cattctagaATGTTACGAGTTCGGACGTGAAGGC                                                          |
| cloning_ORF23-R                     | taagccgccgcTTAGACGGTCAATAAAGCG                                                              |
| cloning_ORF24-F                     | ataccgctATGGCAGCGCTCGAGG                                                                    |
| cloning_ORF24-R                     | taatctagaTTAGACCAGCGGACGGACGC                                                               |
| cloning_ORF30-F                     | catgaattcATGGGTGAGCCAGTGGATCCTG                                                             |
| cloning_ORF30-R                     | tgaaccgctTCATTTCCGACCGGTGTC                                                                 |
| cloning_ORF31-F                     | catgaattcATGTCACAAAACAGAAAGACTCTGC                                                          |
| cloning_ORF31-R                     | tagaccgctCTACGTATCTTTCGTTGATAGC                                                             |
| cloning_ORF66-F                     | cattctagaATGGCCCTGGATCAGCGTGGGATC                                                           |
| cloning_ORF66-R                     | gagccgccgcTCAGGAGGAACACTTCCC                                                                |
| <b>[qPCR/ RT-qPCR]</b>              |                                                                                             |
| real-time_PCR_KSHV ORF11-F          | TTGACAACACGCACCGCAAG                                                                        |
| real-time_PCR_KSHV ORF11-R          | AAAAATCAGCACGCTCGAGGAG                                                                      |
| RT-qPCR_ORF72/vFLIP-F               | CTGGACTTTTGGCACACGAG                                                                        |
| RT-qPCR_ORF72/vFLIP-R               | AGCGCTGATAATAGAGGCGGG                                                                       |
| RT-qPCR_ORF16-F                     | AGATTTACACAGCACCCGGTA                                                                       |
| RT-qPCR_ORF16-R                     | CCCCAGTTCATGTTTCCATCGC                                                                      |
| RT-qPCR_ORF46-F                     | CACTGCTGCGATCCAGAGGATA                                                                      |
| RT-qPCR_ORF46-R                     | GAACTGACATTGCGGATCCAC                                                                       |
| RT-qPCR_ORF59-F                     | AAGGGGAAGAAGTCGGTGGATG                                                                      |
| RT-qPCR_ORF59-R                     | AACCAACCCGGGACTTTACACA                                                                      |
| RT-qPCR_K8.1-F                      | TAAACGGGACCAGACTAGCAGC                                                                      |
| RT-qPCR_K8.1-R                      | GTTTTCTGCGACCGGTGATACG                                                                      |
| RT-qPCR_ORF26-F                     | AAGGGGAAGAAGTCGGTGGATG                                                                      |
| RT-qPCR_ORF26-R                     | AACCAACCCGGGACTTTACACA                                                                      |
| RT-qPCR_ORF25-F                     | TACGGTCTCAGGTATGAGCAGA                                                                      |
| RT-qPCR_ORF25-R                     | GTAGATCCTCCGTGGTTACGAG                                                                      |
| RT-qPCR_ORF27-F                     | GACGCATTTACCCGAACTCTAC                                                                      |
| RT-qPCR_ORF27-R                     | TGCACATGACGTGTTAACATA                                                                       |
| RT-qPCR_ORF42-F                     | TCTCCAGGTGCTTGGTAAAGAT                                                                      |
| RT-qPCR_ORF42-R                     | TAAGCTTCATAAGCGATAGGC                                                                       |
| RT-qPCR_ORF43-F                     | TCCTGTAAACGTCCCAGAGATT                                                                      |
| RT-qPCR_ORF43-R                     | TGTCTCACCAACCAGATAAACG                                                                      |
| RT-qPCR_ORF53-F                     | CTAAAACTATCCGCGGAACAAG                                                                      |
| RT-qPCR_ORF53-R                     | GCCTCGATACTAGGTCACTGCT                                                                      |
| RT-qPCR_ORF55-F                     | GAGGCAATACAGAAGTGGGTTC                                                                      |
| RT-qPCR_ORF55-R                     | GCTCCAGTCCCTCTTAAACAAA                                                                      |
| RT-qPCR_ORF65-F                     | GTTGTGAGAATGTCTGACGCCG                                                                      |
| RT-qPCR_ORF65-R                     | GGTGAATTCAAAGCGGGGATC                                                                       |
| RT-qPCR_ORF68-F                     | TTCTGTCTATACGCCACACTG                                                                       |
| RT-qPCR_ORF68-R                     | CCTCCTTCTTGAAAAGTGCAGA                                                                      |
| RT-qPCR_ORF52-F                     | ACAAAAGCAAGTGGACGATGCC                                                                      |
| RT-qPCR_ORF52-R                     | CTCTTCGTCGCTGTTATTGGC                                                                       |
| RT-qPCR_ORF8-F                      | TGTATCCGCAAGTTCGTAGGAG                                                                      |
| RT-qPCR_ORF8-R                      | GCTCTTGTGGATGTTTACGGAGC                                                                     |
| RT-qPCR_GAPDH-F                     | CATCAAGAAGTGGTGAAGCAG                                                                       |
| RT-qPCR_GAPDH-R                     | TGTCGCTGTTGAAGTCAGAGG                                                                       |
| <b>[CHIP qPCR]</b>                  |                                                                                             |
| CHIP-qPCR_ORF46/47-F                | AGCCCCCTCCGTAATATCTG                                                                        |
| CHIP-qPCR_ORF46/47-R                | TTTTCCGCGGAAGTATGTCG                                                                        |
| CHIP-qPCR_K8.1-F                    | ACTCCCACCATGTTGAAGCTTG                                                                      |
| CHIP-qPCR_K8.1-R                    | GGGATTTCTGTGCGAATCTGTG                                                                      |

*\*a*: Lowercase indicates homology sequence to KSHV BAC16, underlined uppercase indicates mutagenesis site, and uppercase indicates pEP-KanS sequence

*\*b*: underlined lowercase indicates mutagenesis site, and uppercase indicates KSHV BAC16 ORF sequences

**Supplementary Fig. S1 (original data of Fig. 1b)**

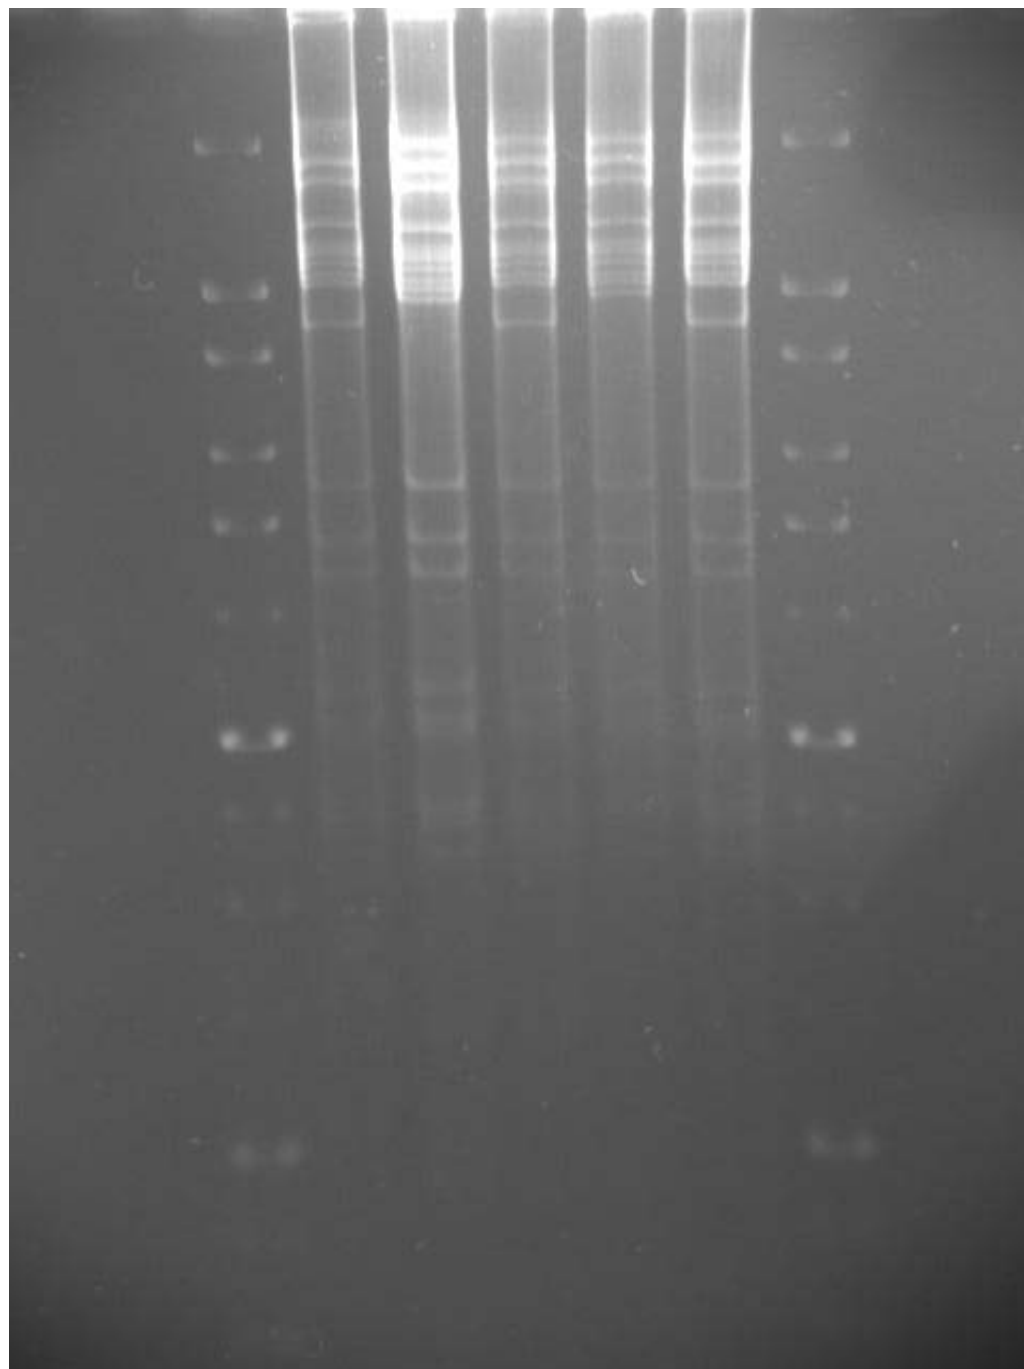

# Supplementary Fig. S2

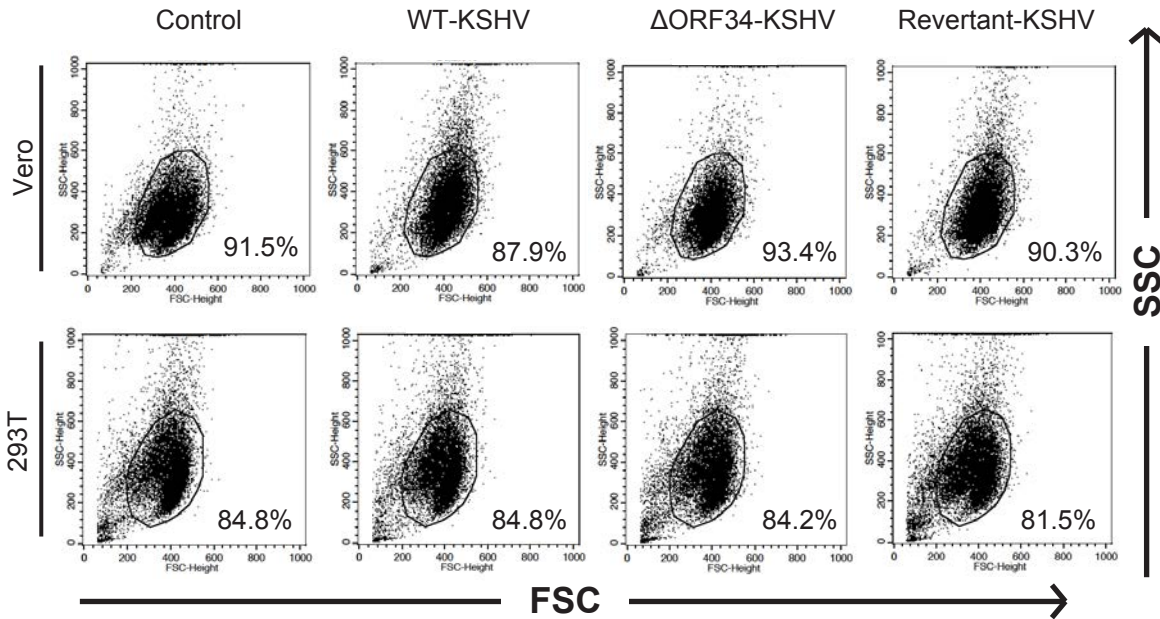

# Supplementary Fig. S3 (original data of Figure 4a)

Whole cell extract | Pull-down: S-Agarose

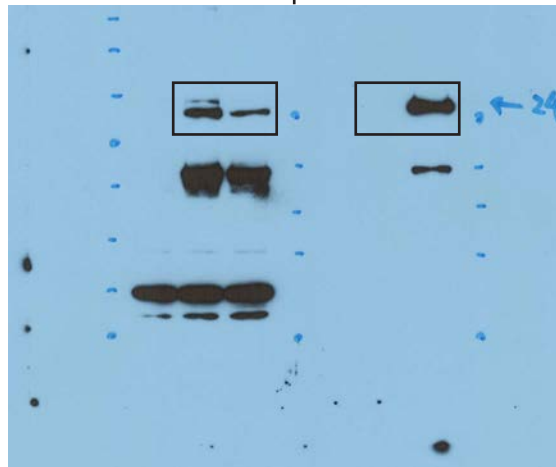

Blot: Myc

Whole cell extract | Pull-down: S-Agarose

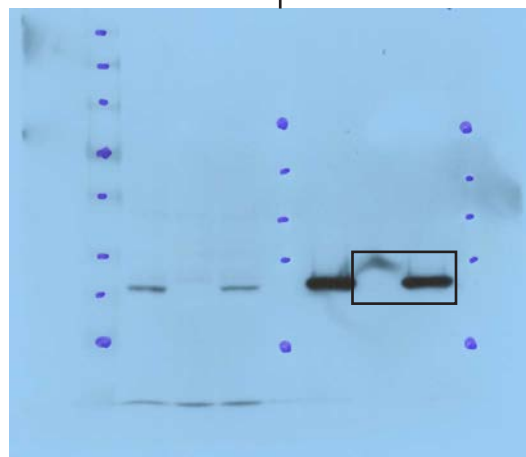

Blot: S

# Supplementary Fig. S4 (original data of Figure 4b)

Pull-down: S-Agarose

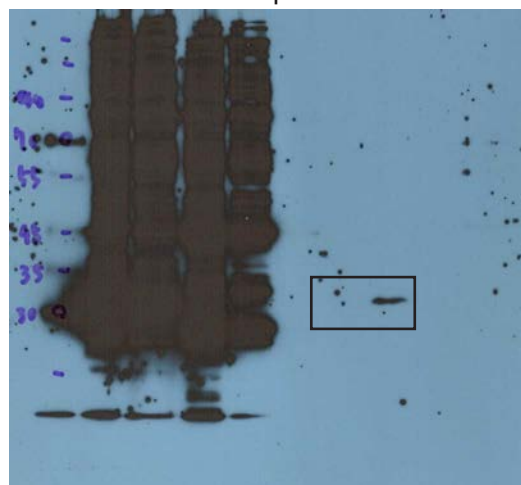

Blot: FLAG

Pull-down: S-Agarose

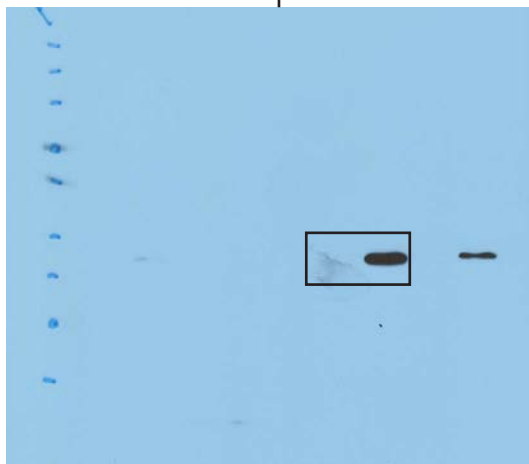

Blot: S

Whole cell extract

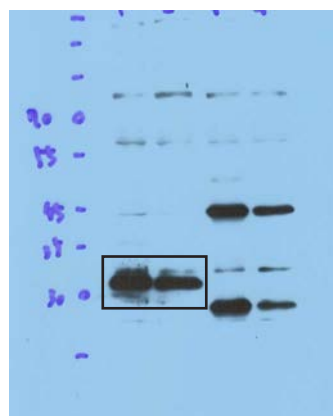

Blot: FLAG

# Supplementary Fig. S5 (original data of Figure 4c)

Pull-down: S-Agarose

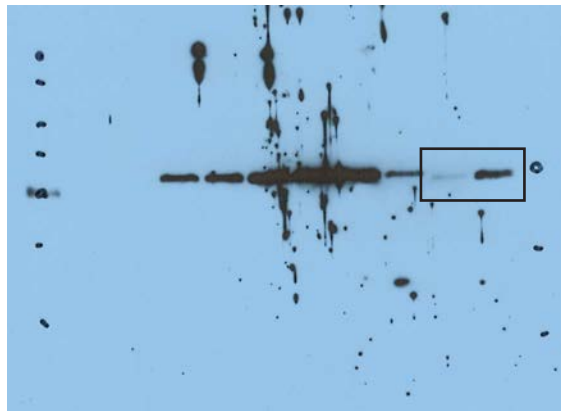

Blot: FLAG

Pull-down: S-Agarose

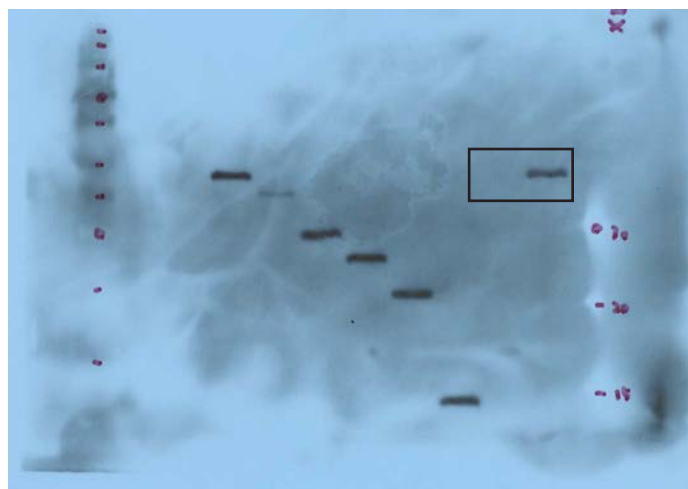

Blot: S

Whole cell extract

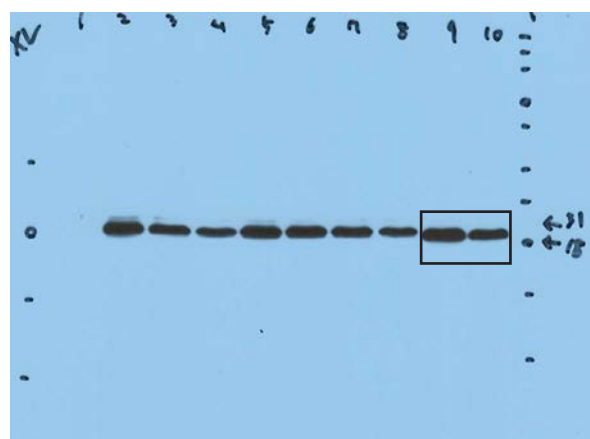

Blot: FLAG

# Supplementary Fig. S6 (original data of Figure 4d)

Pull-down: S-Agarose | Whole cell extract

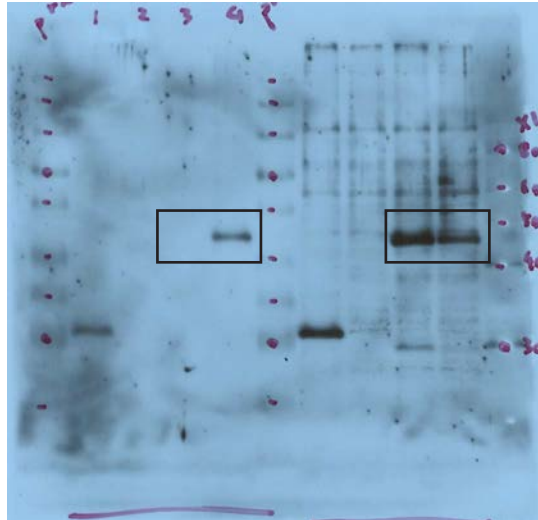

Blot: FLAG

Pull-down: S-Agarose

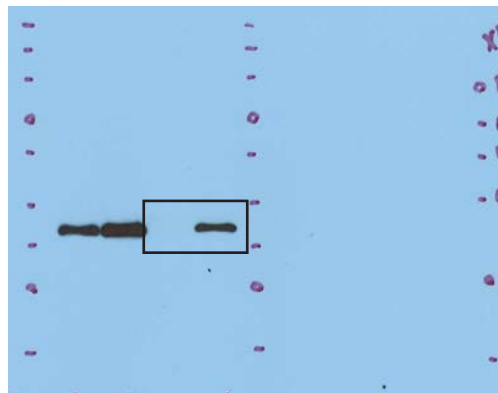

Blot: S



# Supplementary Fig. S7 (original data of Figure 4e)

Pull-down: S-Agarose | Whole cell extract

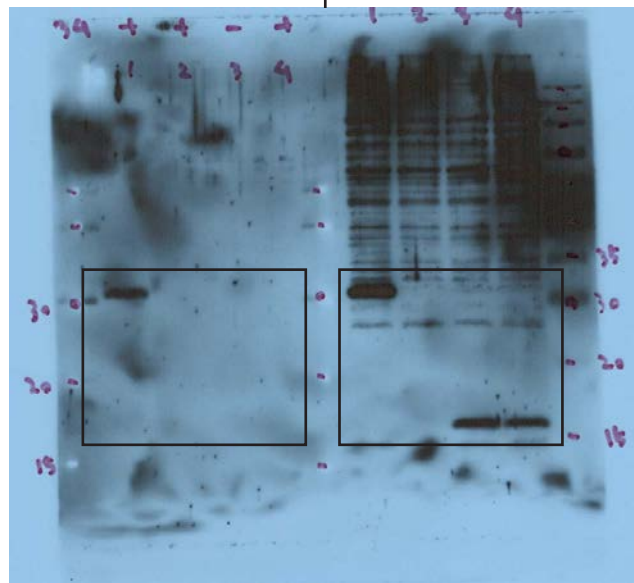

Blot: FLAG

Pull-down: S-Agarose

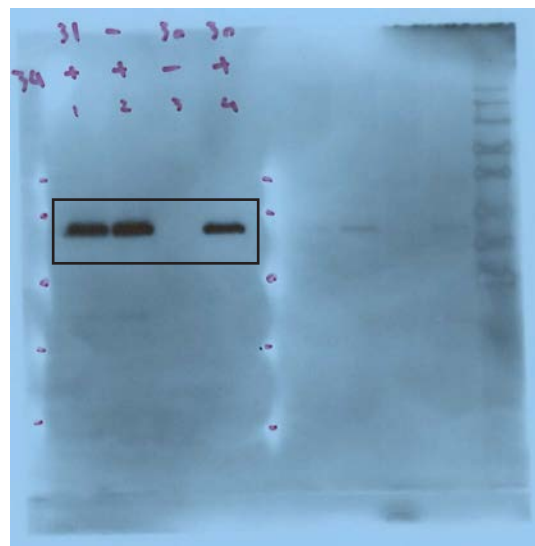

Blot: S

# Supplementary Fig. S8 (original data of Figure 4f)

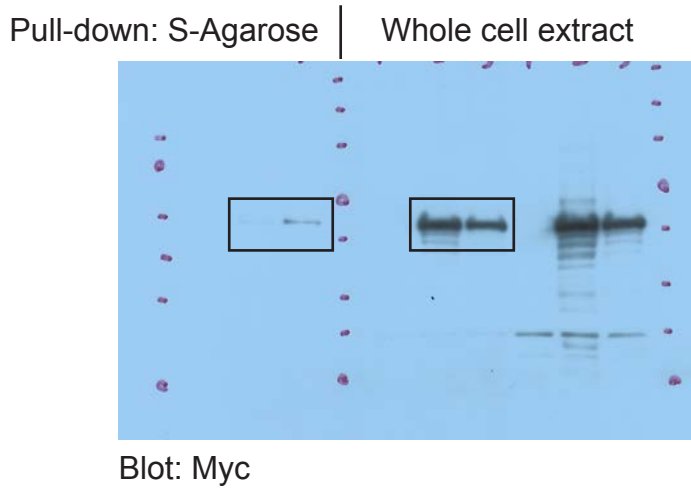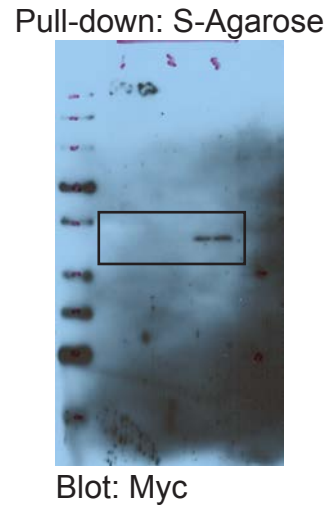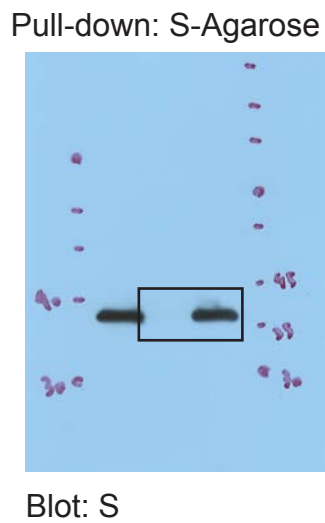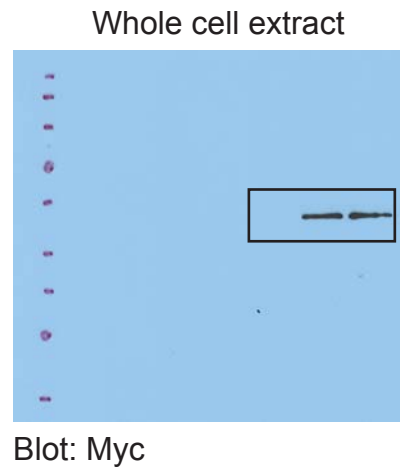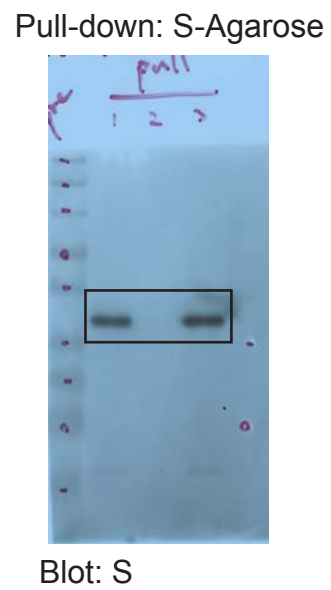

## Supplementary Fig. S9

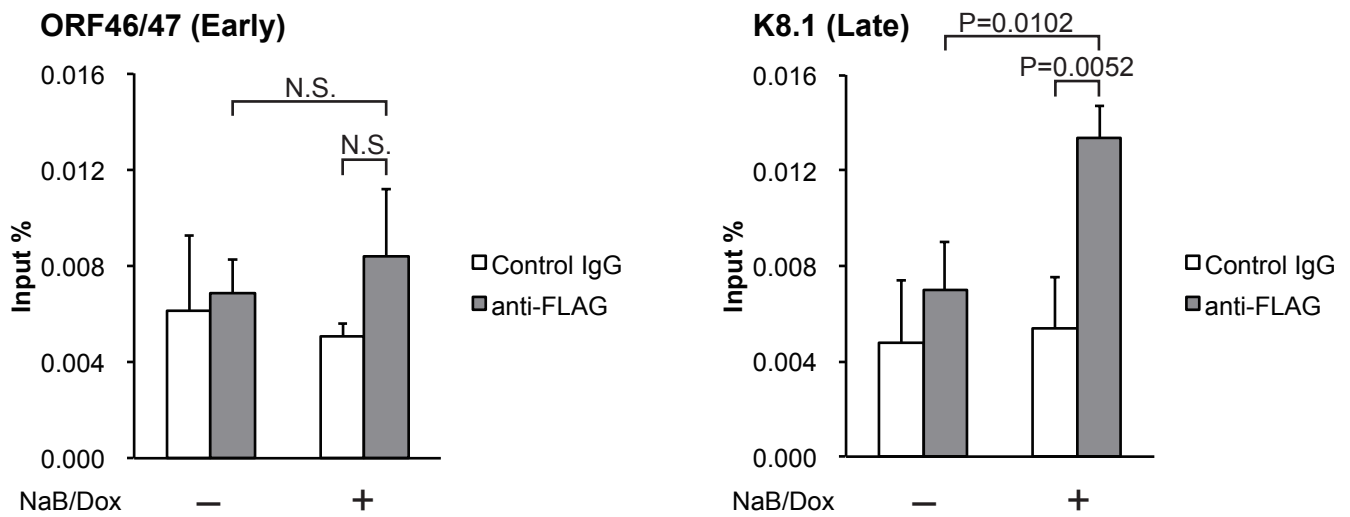

To establish iVero- $\Delta$ ORF34 cells stably expressing 3xFLAG-ORF34 protein, iVero- $\Delta$ ORF34 cells were transfected with 3xFLAG-tagged ORF34 plasmid, and then selected and maintained with media including 1.5 mg/mL G418. 3xFLAG-ORF34-expressing iVero- $\Delta$ ORF34 cells were treated with (or without) Dox and NaB for 72 hours and subjected to ChIP-qPCR. 3xFLAG-tagged ORF34 protein was Immunoprecipitated by anti-FLAG or control antibody, and precipitates including chromatin and viral DNA were subjected to SYBR green real-time PCR for measuring the amount of promoter DNA of ORF46/47 (E gene) or K8.1 (L gene). The levels of immunoprecipitated viral promoter were normalized to total input DNA.

# Supplementary Fig. S10 (original data of Figure 5b)

Pull-down: S-Agarose

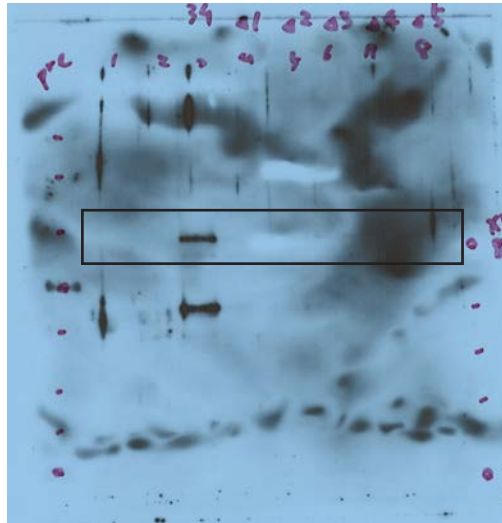

Blot: Myc

Pull-down: S-Agarose

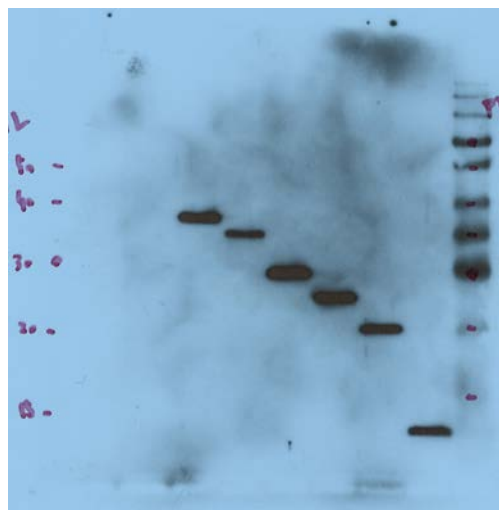

Blot: S

Whole cell extract

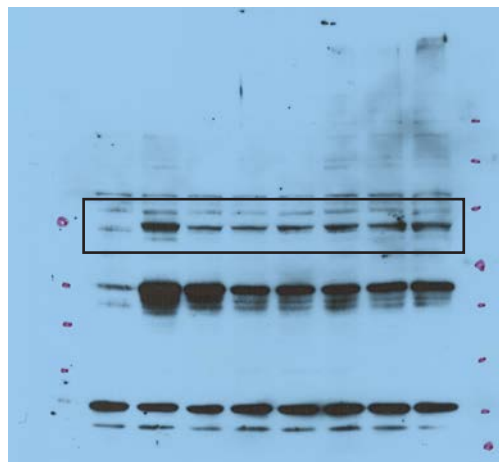

Blot: Myc

# Supplementary Fig. S11 (original data of Figure 5c)

Pull-down: S-Agarose

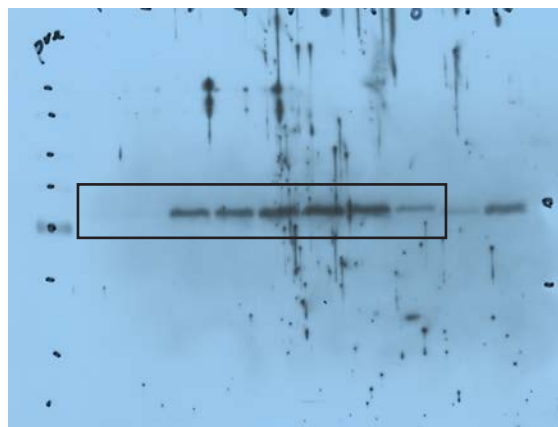

Blot: FLAG

Pull-down: S-Agarose

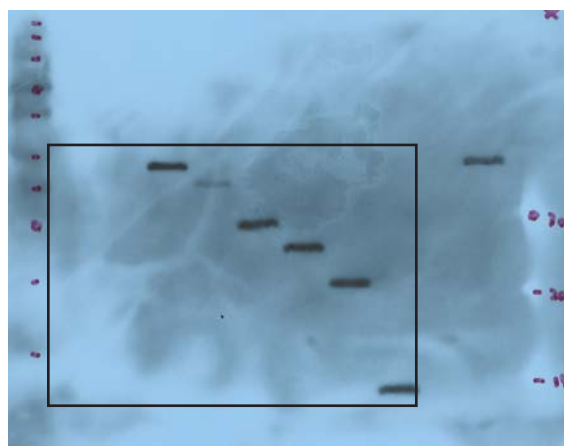

Blot: S

Whole cell extract

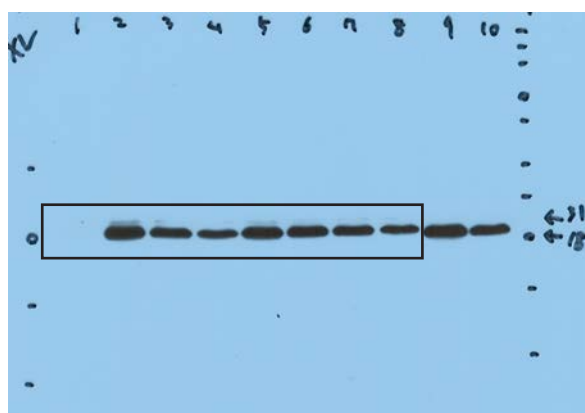

Blot: FLAG

# Supplementary Fig. S12 (original data of Figure 5d)

Pull-down: S-Agarose

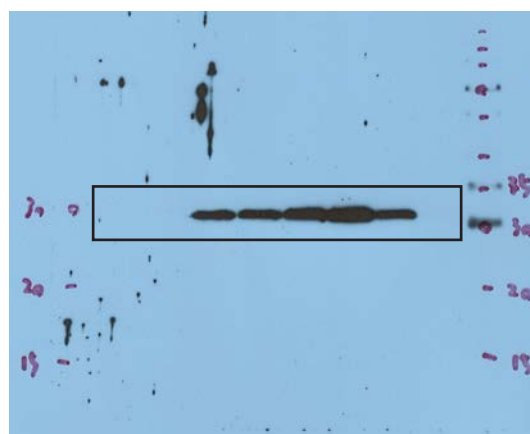

Blot: FLAG

Pull-down: S-Agarose

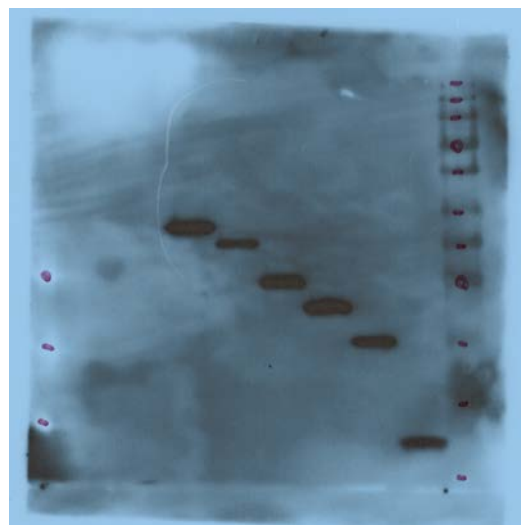

Blot: S

Whole cell extract

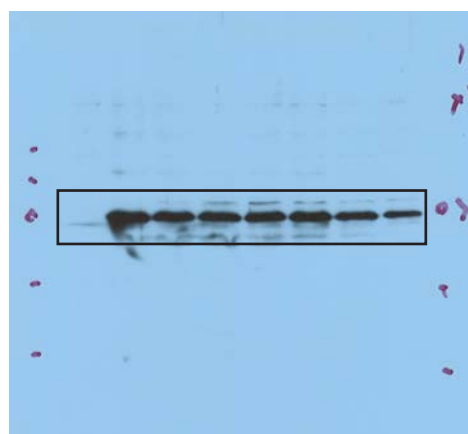

Blot: FLAG

# Supplementary Fig. S13 (original data of Figure 5e)

Pull-down: S-Agarose

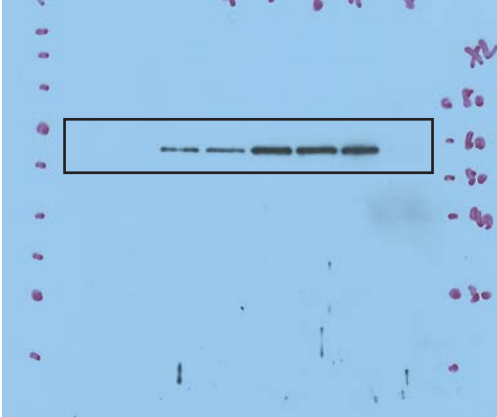

Blot: Myc

Pull-down: S-Agarose

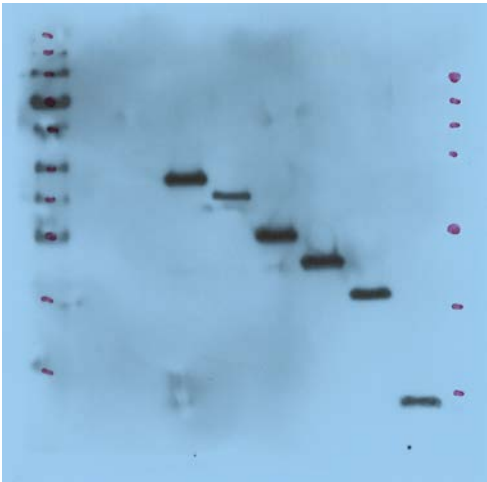

Blot: S

Whole cell extract

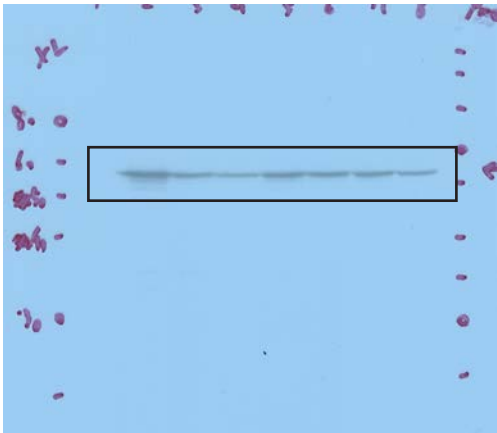

Blot: Myc

## Supplementary Fig. S14 (original data of Figure 5f)

Pull-down: S-Agarose

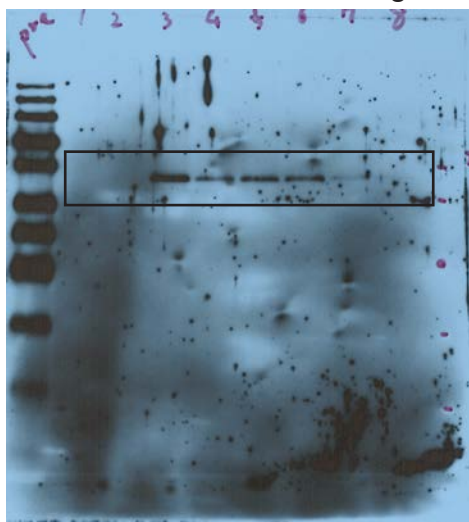

Blot: FLAG

Pull-down: S-Agarose

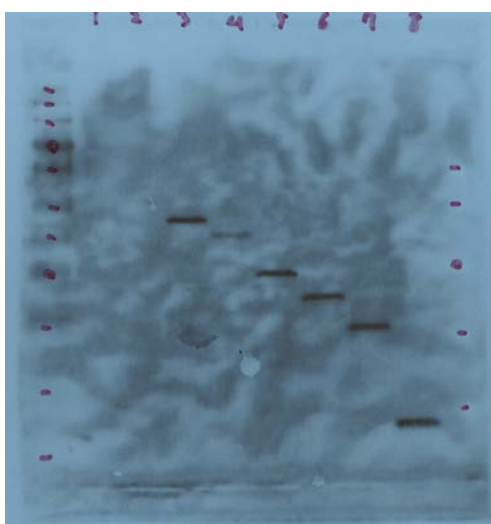

Blot: S

Whole cell extract

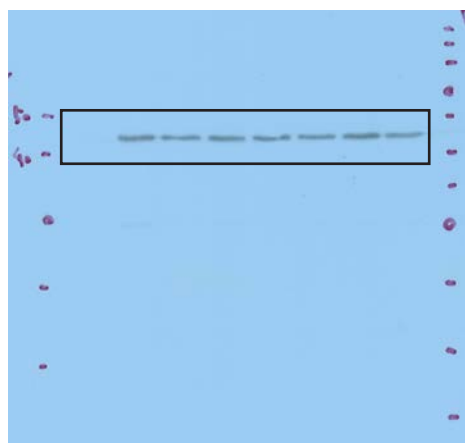

Blot: FLAG
